# Supplementary material for: Understanding shallow landslides in Campos do Jordão Municipality – Brazil: disentangle the anthropic effects from natural causes in the disaster of 2000
Source: Copernicus journal article supplement (doi:10.5194/nhess-2017-242), 2017-07-14
Supplement: Supplementary file [file nhess-2017-242-RC2-supplement.pdf]

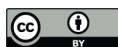

1 **Understanding shallow landslides in Campos do Jordão Municipality – Brazil:**  
2 **disentangle the anthropic effects from natural causes in the disaster of 2000**

3 Rodolfo Moreda Mendes<sup>1)</sup>, Márcio Roberto Magalhães de Andrade<sup>1)</sup>, Javier Tomasella<sup>1)</sup>, Márcio Augusto Ernesto de  
4 Moraes<sup>1)</sup>, Graziela Balda Scofield<sup>1)</sup>

5  
6 <sup>1)</sup>National Center for Monitoring and Early Warning of Natural Disasters, Parque Tecnológico/São José dos Campos, Estrada  
7 Doutor Altino Bondesan 500,12247-016, São Paulo, Brazil

8 *Correspondence to:* Rodolfo Moreda Mendes (rodolfo.mendes@cemaden.gov.br)

9  
10 **Keywords:** shallow landslides, natural and human factors, numerical modeling, early warning system

11  
12  
13 **Abstract**

14 Located in a mountain area of Southeast Brazil, the municipality of Campos do Jordao has been hit by several landslides in  
15 recent history. Among those events, the landslides of early 2000 were significant for the number of deaths (10), the  
16 population affected and the destruction of infrastructure that caused. The purpose of this study is to assess the relative  
17 contribution of natural and human factors in triggering the landslides of the 2000 event. To achieve this goal, a detailed  
18 geotechnical survey was conducted in three representative slopes of the area to obtain geotechnical parameters needed for  
19 slope stability analysis. Then, a set of numerical experiment with Geo-Slope software was designed including natural and  
20 anthropic factors separately. Results showed that natural factors, thus is, high intensity rainfall and geotechnical conditions,  
21 were not severe enough to trigger landslides in the study area and that human disturbance were entirely responsible for the  
22 landslides events of 2000. Since the anthropic effects used in the simulations are typical of Brazilian hazardous urban areas,  
23 we concluded that the implementation of public policies that constrain the occupation of landslide susceptible areas are  
24 urgently needed.

25  
26



## 27 **1 Introduction**

28 Due to the combination of frequent heavy rain of high intensities on landscapes dominated by narrow valley and steep  
29 slopes, large areas of the southeast and south of Brazil are naturally susceptible to landslides. In addition, population growth,  
30 increased urbanization (about 90% of Brazilian population live in urban areas), and expansion of urban construction into  
31 hazardous areas have led to an escalating impact of this natural disaster. Consequently, landslides are directly associated  
32 with loss of lives, property and infrastructure damage, and environmental destruction. During 2011, for instance,  mountains  
33 regions of Rio de Janeiro State suffered several landslides that caused more than 1,500 deaths and severe damage to the  
34 urban and rural infrastructures (Coelho Netto et al., 2013).

35 In spite of floods (generally gradual flooding) being the most disrupted natural disasters in terms of economic  
36 damages and population affected, landslides have been considered the most severe in terms of dead toll (Londe et al., 2014).  
37 Although landslide and flashfloods usually affect heavily urbanized downtown areas, it is also recognize that poor  
38 population living in the outskirts are more vulnerable to these types of disaster. Increased landslide hazard, for instance, has  
39 been related to the improper cut-and-fill construction of self-built housing on steep slopes, after the removal of forest cover.  
40 In addition, because of the lack of collection systems, sewage is disposed into the hillslope soils further increasing the risks  
41 of triggering landslides, not to mention the health risks associated with the lack of sanitation.

42 Among those areas affected by landslides in SE Brazil, the municipality of Campos do ~~Jordao~~ Jordão has been hit by several  
43 events since the seventies. The most recently severe landslides occurred in the early days of 2000, leaving 103 people  
44 injured, 10 fatalities, and more than 423 houses at risk of collapse (Londe et al., 2014).

45 Early warning system used by the civil defense in Campos do Jordão and by CEMADEN are based on threshold  
46 values of 72 h accumulated rainfall, derived from empirical studies (Tatizana et al., 1987; Santoro et al., 2010). In 2000,  
47 rainfall was monitored every 24 h at 7:00 am using manual rain-gauges, and the threshold value for triggering landslides  
48 ~~were~~ based on previous studies in other areas of Brazil. Since the accumulated rainfall values responsible for the occurrence  
49 of the landslides of 2000 were well below the critical line proposed in previous studies (Tatizana et al., 1987), it was not  
50 possible to conduct the pre-emptive evacuation of many hazardous areas.

51 Although empirical rainfall thresholds are successfully used in operational warning systems to predict shallow  
52 landslides (Lagomarsino et al., 2013), critical rainfall thresholds for triggering landslides vary due to regional and local  
53 precipitation distribution, slope morphometry, soil characteristics, lithology, microclimate and geological history (Crosta,  
54 1998; Van Asch et al., 1999). Therefore, the reliability of empirically derived critical rainfall threshold depends entirely on  
55 the availability of a significant number of cases relating the occurrence of landslides and rainfall conditions. In this sense,  
56 Guzzetti et al. (2007) lists as regional thresholds those covering regions with a few to many thousands square kilometers and  
57 having similar meteorological, climatic and physiographic characteristics, whereas for local conditions the geomorphology  
58 and climate regime are considered to be applicable to areas that range in the order of hundreds of square kilometers.

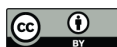

59 After the event of 2000, new critical 72 h rainfall thresholds values for landslides were proposed for the area. In  
60 addition, the Civil Defense of the State of São Paulo established new critical rainfall amounts for visually monitoring critical  
61 areas in order to detect early signals that may indicate the imminence of a landslide. However, the peak rainfall intensities  
62 recorded in the event of 2000 did not repeat even since, while irregular occupations continued in many landslide prone areas.  
63 Therefore, a detailed study of the event of 2000 is relevant not only because its extreme ~~characteristic~~, but also with the  
64 perspective that memory of the 2000 event is dim and its impacts is largely underestimated among many local residents.

65 In this context, for a limited number of data hydrologic models are relevant for investigating precipitation induced  
66 shallow planar landslides (Terlien, 1998). Given the lack of detailed data form historical landslides events in the  
67 municipality of Campos do ~~Jordao~~, the aim of this study was to understand the factors responsible for triggering the  
68 landslides of early 2000 in Campos do ~~Jordao~~ using a numerical model of slope stability. We analyzed several scenarios that  
69 included the relative influence of natural and anthropic factors that prevails in the area, and identified the most critical  
70 factors responsible for the severe landslides of 2000. In addition, we analyzed if the threshold rainfall values establish by the  
71 Civil Defense are adequate for early warning of landslides occurrence taking into account the today's occupation patterns of  
72 landslide prone areas.

OK. The problem seems to be well put

## 74 2 Material and Methods

### 75 2.1 Study site

76 The study site is the municipality of Campos do ~~Jordao~~, of the State of São Paulo, located in a ~~mountain~~ region along the  
77 Mantiqueira Hills (Figure 1). In geological and geomorphological terms, the ~~Jordan Field~~ teau is a crystalline plateau  
78 block with elevations of more than 2,000 m above sea level and bordered by steep cliffs that rise approximately 1,500 m  
79 over the adjacent Paraíba valley (Almeida, 1976). The relief, strongly conditioned by the structures and lithologies of the  
80 area, is characterized by the presence of high hills and erosion of grandstands. On the basis of these amphitheatres occur peat  
81 depressions (Modenesi-Gauttieri and Hiruma, 2004), where deposits of organic clay of varying thickness are found. The  
82 geological and geotechnical characteristics of the deposits of organic clay and its quite sensitive behavior to sudden human  
83 interventions that alter their original equilibrium conditions have conditioned the slopes stability in the urban area of the  
84 municipality of Campos do ~~Jordao~~ (Ogura et al., 2004).

85 The area where Campos do ~~Jordao~~ is located was occupied by Portuguese settlers during the XVIII century. During  
86 the hygienist movement (late XIX and early XX centuries), various health facilities were established in the town, mainly for  
87 tuberculosis treatment. Since 1940, the town experienced a large population growth and urban expansion due to the  
88 development of tourism: the number of inhabitants increased from 13 thousand in 1950 to more than 50 thousand according  
89 to the estimates, with density of 164.76 pop/Km<sup>2</sup>, 99.3% of which live in the urban area (IBGE, 2016).

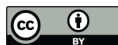

90 The process of accelerated urbanization, specially from the 70s, of areas with unfavorable geotechnical  
91 characteristics, has been pointed out as responsible for most of the natural disasters in Campos do Jordao (Ridente et al.,  
92 2002). Table 1 shows the most important events in terms of dead toll and damages recorded in the area.

93 In the case of the event of 2000 (Figure 2), which is the focus of this study, rainfall began on 31/12/1999, and  
94 ~~continues almost interrupted~~ for 4 days with high intensity rainfall bursts. According to the Brazilian Center for Weather  
95 forecasting and Climate Study – CPTEC, daily rainfall from 31/12/1999 through 05/01/2000 was, respectively, 78.5, 101,  
96 120, 60, 144.5 and 10.5 mm (Ridente et al., 2002). Landslides associated with this event, were considered to be one of the  
97 most severe in urban areas in Brazil, since hundred of landslides occurred, mostly in slopes in poor neighborhoods where  
98 ~~house~~ are constructed over cut-and-fill areas.

100 Based on the landslides events of 1972, 1991 and 2000, Ridente et al. (2002) proposed an approximation of the  
101 critical rainfall necessary for the deflagration of landslides in Campos do Jordão, revealing that, in most cases, landslides are  
102 due to occur after three-day rainfalls of about 200 mm, with a daily rainfall of at least 70 mm during the last day analysed.  
103 The Civil Defense Preventive Plan of the State of São Paulo uses three indexes of precipitation accumulated in three days  
104 (60, 80 and 100 mm) as critical thresholds to enter into warning level (Santoro et al., 2010). These thresholds ~~was~~ based on  
105 the studies carried out by Tatizana et al. (1987) and has been considered a critical value for issuing early warnings based on  
106 rainfall observation and forecasting.

107 Aiming to develop relationships for the prediction of mass movements in the area, Ahrendt (2005) attempted to  
108 correlate precipitation with the occurrence of landslides based on the critical intensity curves obtained by Tatizana et al.  
109 (1987) for Serra do Mar in the municipality of Cubatão, and by D'Orsi (1997) for Serra da Mantiqueira in the Municipality of  
110 Rio de Janeiro. Results showed that the occurrences of Campos do Jordão were below the critical lines of those areas,  
111 indicating that the rainfall intensities required for triggering landslides in Campos do Jordão are much lower if compared to  
112 the other sites. Therefore, the study of Ahrendt (2005) concluded that rainfall characteristics that triggers landslides in  
113 Campos do Jordão are very unique and a different and more detailed approach was needed.

114 Considering the limited historical data of landslide occurrences and the few previous studies in the area that makes  
115 extremely difficult to define accurate critical threshold rainfall values that triggers landslides, in particularly, the effects the  
116 accumulated rainfall on the water movement and its relationship to rapid mass movements.

117 The Brazilian National Centre for Monitoring and Early Warnings of Natural Disasters – CEMADEN began to  
118 monitor Campos do Jordão by the summer of 2012. Most of the occurrences were observed in cut-and-fill slopes, with  
119 evident contribution of wastewater and micro drainage deficiency. Recent history did not recorded occurrences of great  
120 magnitude; **however, the destruction, or even the prohibition of occupying damaged houses, is a recurrent problem.**

121 It should be better explained the meaning of the sentence



## 122 2.2 Soil moisture monitoring

123 Soil moisture was monitored in every hourly interval to a depth 3.0 meters along the 12 months (01/01/2016 to 12/31/2016),  
124 using two EnviroScan<sup>TM</sup> probes installed next of the borehole SD-03 (Figure 3). EnviroScan<sup>TM</sup> probes are installed into  
125 customized access tubes manufactured by Sentek Pty. Ltd. Inside of the EnviroScan<sup>TM</sup> probe were distributed six Sentek  
126 capacitance ~~sensor~~. The capacitance sensor gives an output in volumetric water content (mm of water per 100 mm of soil  
127 measured). This is converted from a scaled frequency reading using a default calibration equation, which is based on data  
128 obtained from numerous scientific studies in a range of soil textures.

129 Before a Sentek capacitance sensor can be installed in the soil, it must have minimum and maximum values set. This  
130 is done using air and water around each sensor (lecture limits of the volumetric water content – dry and saturated,  
131 respectively).

132 Soil moisture was monitored in the study area at regular intervals of 1 h to a depth 3.0 meters during 2016 using two  
133 EnviroScan<sup>TM</sup> (Campbell Scientific, 2016) probes installed next of the borehole SD-03 (Figure 2). Every EnviroScan<sup>TM</sup>  
134 probes included six capacitance sensors that allowed the determination of soil moisture every 0.5 meter, thus is, at the depths  
135 of 0.5, 1.0, until 3.0 m deep. This distribution of depths allowed to ~~monitoring~~ moisture variations for those soil layers which  
136 are relevant to this study: landfill, residual soil and saprolith. Sensor calibration was based on the relationship provided by  
137 the manufactured (Campbell Scientific, 2016) based on dry and wet readings of each sensor.

138

## 139 2.3 Geotechnical survey

140 SPT (Standard Penetration Test) boreholes and soil sample collections were performed at six (06) locations along the slope  
141 (SD-01 to SD-6) along three different profiles (Figure 3). Disturbed and undisturbed samples were taken under different  
142 geotechnical conditions for stability analysis of three (3) critical profiles of the study area (A-A'; B-B'; C-C').

143 Three (03) undisturbed samples were collected in migmatitic saprolith block close to the SD-04 borehole. This  
144 material occurs anisotropically and discontinuously, because it presents significant textural variation resulting from the  
145 heterogeneity of the parental rock, being predominantly formed by silt and fine sand, with variable occurrence of clay. From  
146 the 6 boreholes (SD-1 to SD-6) and the 3 undisturbed blocks it was possible to obtain a total of 12 soil samples to perform  
147 geotechnical characterization tests of the study area following Brazilian standard procedure.

148 Disturbed and undisturbed samples collected were used to perform grain size analysis test (ABNT, 1984b and 1995),  
149 soil particle density (ABNT, 1984a), bulk density, specific dry mass and Atterberg limits (ABNT, 1984c and 1984d).  
150 Parameters of effective cohesion ( $c'$ ) and effective friction angle ( $\phi'$ ) were obtained from saturated direct shear tests, using  
151 square shaped undisturbed samples with 60 mm of side and height of 25 mm. The soil samples were in their natural state,  
152 being representative of the “Residual” and “Saprolith” soil layers. All samples were saturated and subjected to net normal



153 stress of 25, 50 and 100 kPa applied during 24h with a constant velocity of 0.033 mm/min. The vertical displacements were  
154 recorded during this period and after stabilization.

155 Water retention curves -WRC of the residual soils layers were obtained using pressure plate for suctions <100 kPa  
156 and filter paper for suctions  $\geq$  100 kPa. Samples were initially saturated for 12 hours. The saturated hydraulic conductivity -  
157  $K_{sat}$  was obtained in laboratory using a constant head permeameter. Hydraulic conductivity functions were estimated from  
158 the WRC,  $K_{sat}$  using the Van Genuchten (1980) model. In the case of landfill deposits, the values of  $K_{sat}$  for different soil  
159 texture were those obtained Ahrendt (2005) from core measurements.

160 How were the curve compatibilized. One is a drying path and the other a wetting path

## 161 2.4 Modelling experiments

162 Physical-based hydrological models have been widely applied to predict the development of pore-pressure due to the  
163 infiltration in shallow landslides (Frattoni et al., 2009; Iverson, 2000). Generally, soils with high permeability become  
164 unstable under saturated conditions, while soils with low permeability may destabilize even in unsaturated conditions due to  
165 the decrease of the shear strength caused by low soil matrix suction. Several models, based on the infinite slope concepts,  
166 that integrates hillslope hydrology with slope stability are reported in literature, for instance CHASM (Anderson and Lloyd,  
167 1991), SHALSTAB (Dietrich et al., 1998), TRIGRS (Baum et al., 2002) and GEOtop-FS (Rigon et al., 2006).

168 GeoStudio (2012) is another coupled hydrological slope stability model, in which SEEP/W and SLOPE/W plugins are  
169 used to simulate the instability of slopes during extreme rainfalls, which ~~were~~ the software package used in this study.  
170 Several previous studies have studied the effect of infiltration on rainfall-induced landslides using those plugins (for instance  
171 Ng and Shi, 1998; Gasmol et al., 2000; Kim et al., 2004; Huat et al., 2006; Oh and Vanapalli, 2010; Acharya et al., 2016). In  
172 this study, the versatility of GeoStudio (2012) for handling boundary conditions allowed to simulate several scenarios  
173 involving natural conditions and anthropic factors separately.

174 The modelling of the stability and seepage analysis was divided in two parts: (1) transient unsaturated seepage  
175 analysis; (2) stability analyses coupled with the results from the previous step.

176 For the seepage analysis, 35-days accumulated rainfall of the period 01/12/1999 through 04/01/2000 was considered,  
177 since that event triggered several landslides in the study area (Ahrendt and Zuquette, 2003). In addition to the geotechnical  
178 parameters, anthropic factors that induce landslides typical of Brazilian urban slopes, specifically housing load, man-made  
179 cuts and leakage from pipes, were included in the modelling experiment with the aim of analysing the degree of influence of  
180 these factors on the trigger of landslides in the study area during 2000 (Figures 3 and 4).

181 The boundary conditions were set according to field observations on the landslide area (Figure 4) and boundary  
182 conditions used by Rahardjo et al. (2007). The non-saturated transient flux results were obtained for two cases: considering  
183 only the accumulated rainfall and rainfall including linear leakage along the cut slope. The initial pore-pressure values used  
184 in the transient flow analysis were obtained indirectly from the WRC and the data of the Soil moisture sensors installed in  
185 the study area (Figures 6 and 7).



186

187 Next, the factor of safety (FS) for the slope was estimated from the transient seepage modelling coupled with the  
188 stability analysis tool (Geo-Slope, 2012a). All the stability analyses were conducted considering the theory of static  
189 equilibrium of forces and momentum. The FS were calculated using the geotechnical and anthropic parameters, obtained  
190 from the method of Morgenstern-Price, which considers circular and non-circular rupture surfaces.

191

## 192 **3 Results**

### 193 **3.1 Geotechnical survey**

194 The result of the granulometric analyses of the residual and saprolith layers of the three profiles studied are presented in  
195 [Figure 4](#). Residual layer (sample SD-01/2.0m) can be classified as sandy loam, with percentage of sand and silt of 53 % and  
196 25 % respectively.

197 The soil samples representative of the saprolith layer showed a significant variation of the percentage of the clay  
198 fraction (3 to 24%), silt (14 to 42%) and sand (53 to 73%), indicating that soil profiles are heterogeneous, which in  
199 agreement with the textural characteristics of its parent material (migmatitic gneiss). Therefore, it is expected that the  
200 mechanical and hydraulic properties of this soil layer **is also heterogeneous**. The general results of the geotechnical tests  
201 (general characteristics, shear strength and saturated hydraulic conductivity) of the samples of the representative soils of the  
202 studied area are presented in Table 2.

205 Analysing the values of the effective  stance parameters ( $c'$  and  $\phi'$ ) and saturated hydraulic conductivity (Table 2),  
206 the values representative of the 'Saprolith' layer showed significant variability: the coefficient of variation was 85% for the  
207 effective cohesion; 20% for the effective friction angle, and 89% for the saturated hydraulic conductivity, reflecting the  
208 heterogeneity character of the parent material. The values of the resistance and Ksat parameters obtained in this study are  
209 comparable to other mean reference values of residual gneiss soils representative of other Brazil (Costa Filho and Campos,  
210 1991; Ahrendt, 2005; Reis et al., 2011).

211 [Figure 5](#) shows the water retention curves of the soil layers representative of the profiles. In general, the residual and  
212 saprolith layers are able to hold more water compared to the landfill deposit. For example, for a field matrix suction level of  
213 100 kPa, the volumetric moisture values of the Landfill Deposit, Residual Soil and Saprolith layers are, respectively,  $0,06$   
214  $\text{m}^3/\text{m}^3$ ;  $0,24 \text{ m}^3/\text{m}^3$ ;  $0,26 \text{ m}^3/\text{m}^3$ .

215

216

217

218

219



### 220 3.2 Soil moisture data

221 Soil moisture data from 2016 from the EnviroScan probes (3G1 and 3G2) are presented in Figure 7. The data from 3G1  
222 (upper graph of Figure 7) showed that the sensor installed at a lower depth (0.5 to 1.0 meter), representative of the landfill  
223 deposit (green curve) layer, have variations larger soil moisture variations ( $\Delta\theta = 32\%$ ), with maximum and minimum  
224 humidity values recorded in March (46%) and April (14%), respectively. At deeper layers (1-3 meters deep), representative  
225 of the "Residual" and "Saprolith" layers (black and red curves), time variation of soil moisture is much lower ( $\Delta\theta = 10\%$ , on  
226 average). In the r Residual layer (black curve), maximum and minimum values of soil moisture were verified in January  
227 (38%) and May (27%), respectively. In the case of the saprolith layer (red curve) maximum and minimum humidity values  
228 in the months of June (40%) and May (32%). The different dynamics among the three soil layers are reflecting not only  
229 differences in the retention properties of each layer considered but also the deep soil water dynamics down the soil profiles.  
230 This explains why the upper layer (landfill deposit) shows a more spiky behaviour in response the rainfall; while the other  
231 two layers exhibit gradual and delayed variations related to deep water percolation.

232 Analysing the data of the probe 3G2 (lower graph of Figure 7), it is clear that the soil moisture variation of the sensor  
233 of the surface layer, representative of the Landfill Deposit layer (green curve), was significantly lower ( $\Delta\theta = 15\%$ ) compared  
234 to the same layer of probe 3G1. Maximum and minimum soil moisture values were recorded in September (43%) and  
235 August (28%), respectively. At deeper depth, within the residual and saprolith layers (black and red curves), time variation  
236 of soil moisture variation is similar than the measurements of probe 3G1 ( $\Delta\theta = 9\%$ , on average). For the "Residual" layer  
237 (black curve) maximum and minimum soil moisture values were observed in January (31%) and May (21 %), respectively;  
238 while in the "Saprolith" layer (red curve) maximum and minimum soil moisture values in the months of January (37%) and  
239 August (30%).

240 Contrasting differences in the soil moisture behaviour of the landfill deposit from the probes 3G1 and 3G2 clearly  
241 indicates that soil parameters variability is much higher in top layer. This was expected considering that this layer is the  
242 result of the cut-and-fill processes mixed with construction waste of several types.  
243

### 244 3.3 GeoSlope simulations input data

245 Table 3 summarizes the parameters used in the numerical simulation with GeoSlope software, based on the geotechnical  
246 survey and information extracted from different sources.

247 Regarding the geotechnical properties, in order to reduce the uncertainties due to the heterogeneity of the parent  
248 material, the mean values of the resistance ( $c'$  and  $\phi'$ ), bulk density and saturated hydraulic conductivity parameters for  
249 saprolith and residual (Table 2) were used in the flow and stability modelling. As mentioned before, for the landfill deposit,  
250 the geotechnical parameters were those obtained by Ahrendt (2005).

251 Based on the field information from previous studies in Brazil, the anthropic factors considered in the simulations  
252 were: point leakage sources of  $1.0 \text{ m}^3\text{day}^{-1}$  (SABESP, 1993 and 2016) for simulation that include leakage; distributed load



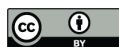

253 due to one floor housing of  $2.0 \text{ kN m}^{-2}$  (ABNT, 1980); height of the cutting slope (based on field data). In the case of the  
254 simulations that include leakage, one point of leaking constant value of  $1.0 \text{ m}^3 \text{ day}^{-1}$  was considered in the cut slope, after the  
255 10<sup>th</sup> day of the simulation until the 35<sup>st</sup> day, since numerical experiments showed that a time interval of 10 days was adequate  
256 to minimize the effect of the uncertainties of initial pore-pressure conditions used in the simulations. It should be noted that  
257 this strategy help to separate the effect of leakage from other anthropic factors, without impacting the results at the end of the  
258 simulation period (day 35).

260 For the transient flow analysis, the highest average moisture values of the three layers was considered (Landfill  
261 deposit -  $\theta_{\text{mean}} = 33\%$ , Residual -  $\theta_{\text{mean}} = 31\%$ , Saprolith -  $\theta_{\text{mean}} = 34\%$ , to November 30, 2016 - light red region in Figure 7).  
262 Subsequently, the mean values of humidity were used to obtain the initial values of matrix suction from the representative  
263 water retention curves of each layer of the profile. The proper choice of the initial values of matrix suction is to provide the  
264 numerical model with a fast and coherent convergence in the pore-pressure distribution of water in the soil layers, aiming to  
265 adjust them satisfactorily to the rain data considered in the flow analysis (01 From December 1999 to January 4, 2000 - 35  
266 days).

267 For the transient flow analysis, the initial conditions of the simulations were derived assuming initial soil moisture  
268 values of  $0.33 \text{ m}^3 \cdot \text{m}^{-3}$ ,  $0.31 \text{ m}^3 \cdot \text{m}^{-3}$  and  $0.34 \text{ m}^3 \cdot \text{m}^{-3}$ , for the landfill deposit, residual and saprolith layers respectively. These  
269 values correspond to average of the highest soil moisture values of the two probes during November 2016, and indicated by  
270 the light-red shaded area of Figure 7.

271 Subsequently, the mean values of humidity were used to obtain the initial values of matrix suction from the  
272 representative water retention curves of each layer of the profile (Figure 6). This choice of the initial values of matrix suction  
273 of the numerical experiments proved to be crucial to achieve a fast and coherent convergence of pore-pressure distribution of  
274 soil layers in the simulations, since they are representative of the 35 days period considered in the flow analysis (From  
275 01/12/1999 through 04/01/2000). Based on this approach, the values of negative pore pressure (matrix suction) were -10 kPa  
276 for landfills, -40 kPa for residual and -40 kPa for the saprolith.

277

### 278 3.4 Factor of safety analysis

279 Figure 8 shows the time variation of the safety factor (FS) during 35 days for the 2000 rainfall for the three profiles. In  
280 Figure 8, two "warning zones" are considered: zone of instability  $\text{FS} < 1.0$ , where the possibility of occurrence of landslides  
281 is high; and low stability stable zone,  $1.0 < \text{FS} < 1.5$ , which indicates a low possibility of landslide occurrence. In this warning  
282 zone the Brazilian Association of Technical Standards (ABNT, 1991) established the following conditions for the safety  
283 degree of the slope: High ( $1.3 \leq \text{FS} < 1.5$ ); Mean ( $1.15 \leq \text{FS} < 1.3$ ); Low ( $1.0 \leq \text{FS} < 1.15$ ).

284 For all three profiles analysed, it is clear that the effect of daily rain on the decrease of the FS (green line) was  
285 practically insignificant, with FS values above the 1.5 threshold (high safety degree of the slope); indicating very low  
286 likelihood of landslides. In the "rainfall only" scenario, the variations in FS values are due to the geotechnical and

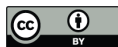

287 geomorphological characteristics of the analysed profiles only. For the "rainfall only" scenario, the difference between FS  
288 values in the three profiles are mainly due to: the surface slope, since the profile AA' is steeper than CC' which is steeper  
289 than BB'; due to differences in the thickness and location of the layers along the slope (Figure 4) and; the water table profile,  
290 related to the soil layers.

291 For the second scenario considered in the analysis of the stability, which includes cut-and-fill effects besides rainfall  
292 (red line in Figure 8), it was verified that the effect of terrain cuts caused minor effects in the slope stability. Except for the  
293 case of the A-A' profile, which presents the FS condition  $<1.5$  between 32th and 35th day after the beginning of rainfall, FS  
294 values were above the 1.5 threshold. However, it is important to note that, in the case of the profile A-A', the decrease of FS  
295 was more pronounced than in the other profiles analysed, directly related to the positioning of the cuts considered along the  
296 slopes located based on field information. The configuration of the cuts used in this profile favour the wetting of the top soil  
297 layer and, consequently affected the whole profile stability. Interesting conclusion

298 The third scenario of Figure 8 (black line), where the joint influence of two anthropic factors (cut and leakage) with  
299 the rainfall of 2000 was considered, and the variations in FS values are significant. For the profile A-A', FS values remained  
300 below the threshold of 1.5; while in the other two profiles FS dropped below 1.5 between the 32th and 35th days of  
301 simulations in the case of the B-B' profile, and on day 17th for the C-C' profile. It should be noted that, after the 11th after  
302 the beginning of simulation, FS values becomes sensitive to rainfall variability.

303 In addition, it can be seen in Figure 8 that the profiles B-B' and C-C' showed greater sensitivity to leakages, mainly  
304 due to the geological-geotechnical characteristics, and the location of the cuts along the slopes, that favoured the decrease of  
305 the matrix suction values and, therefore, induced instability in both profiles. In addition, critical condition,  $FS < 1.0$ , in  
306 profiles A-A' and C-C' are verified between days  and 35th after the beginning of simulations, in response to the  
307 significant rainfall that occurred at the period.

308 Finally, in the fourth scenario of Figure 8 (light brown line), when all the anthropic factors (cut, leakage and housing  
309 loads) are considered together with the daily rainfall. For most of the time, FS values remained below the threshold of 1.5 in  
310 in the A-A' and B-B' profiles, while in the case of the profile C-C' only after the day 34th of the simulation. The probability  
311 of landslides increased significantly ( $FS < 1.0$ ) in all profiles from day 32 of the simulation in response to heavy rainfall at  
312 the end of the period. In the case of the profile C-C' (light brown line), the inclusion of housing loads appears to provide  
313 more stability to the profile, probably related to the fact that the critical break surface estimated by the numerical model was  
314 different from that assumed in the case scenario 3 (black line).

315 Based on the assessment of the Factor of Security presented in Figure 8, it is clear that the probability of landslides  
316 associated to 2000 rainfall on slopes covered with natural vegetation is very low. When considering the influence of rainfall  
317 in conjunction with anthropogenic factors, there was a significant decreased in the security factors in all the profile studied,  
318 although the effect varied between slopes depending on the geological-geotechnical profile characteristics, geomorphological  
319 conditions, water table position and the anthropic conditions, thus is, the positioning of cuts, leakage and housing loads along  
320 the slope.



321 In general, slopes became unstable ( $FS < 1.0$ ) between 32<sup>th</sup> and 35<sup>th</sup> after the beginning of simulations when high  
322 daily accumulated values were verified. Since most of the landslides occurred on day 32<sup>th</sup>, it follows that the model  
323 successfully predicted the time when the landslides began. However, it should be noted that previous accumulated rainfall  
324 values were crucial to create favourable conditions for triggering landslides as shown by Figure 8 after the 30<sup>th</sup> day from the  
325 beginning of simulation.

326 Santoro et al. (2010) recommended in-situ technical surveys of urban hazardous areas after accumulated 72-hour  
327 rainfall equal to 60, 80 and 100 mm (depending on the municipality), in order to identify evidences of the imminence of  
328 landslides and to enforce eventual preventive removal of population. It can be seen in Figure 8 that the 72h accumulated  
329 rainfall were 35 mm for the day 30 after the beginning of simulation; 35 mm for the day 31; 60 mm for the day 32; 191 mm  
330 for the day 33. Thus, critical rainfall thresholds (60-100 mm) were exceeded between 32<sup>th</sup> and 33<sup>th</sup> day for the events  
331 recorded in the year 2000.

332 In this period, the FS in the three analyzed profiles presented the lowest values, located exactly between the "low-  
333 medium security zone" ( $1.0 < FS < 1.3$ ) and "unstable zone" ( $FS < 1.0$ ), which shows that the "anthropic and natural factors  
334 integrated analysis method" proposed in this paper successfully predicted the beginning of landslides. Although the 72h  
335 rainfall threshold value proposed by Santoro et al (2010) proved to be valid for the 2000 event, results of the simulation  
336 indicated that the rainfall 30 days previous to the landslides was crucial to bring FS values closer to critical levels, indicating  
337 that critical value presents limitations on slopes initially drier.

338

#### 339 4 Conclusions

340 The Geo-slope model proved to be an efficient and useful tool to predict the landslide of Campos do Jordão municipality due  
341 to the rainfall event of 2000 and allowed to disentangle the effects of cut-and-fill, construction practices and pipe leakage in  
342 three representative slopes of the area. The use of numerical models that perform flow and stability analyses considering the  
343 simultaneous influence of natural and anthropic variables showed to be accurate for the prediction of occurrences of  
344 landslides on urban slopes.

345 Regarding the rainfall critical values use in early warning system by CEMADEN and the Civil Defense for the  
346 Campos do Jordão Municipality, our study showed that, although adequate for the event of 2000, the previous rainfall  
347 history played a fundamental role to create conditions favourable to the occurrence of landslides. In other words, the  
348 threshold currently used for issue early warning would result in false alarms under initial drier soil conditions.

349 The results of the stability analyses confirmed the hypothesis that the occurrence of landslides in the study area  
350 cannot be attributed solely and exclusively to the rainfall events of the year 2000, despite the significant accumulated values.  
351 Therefore, numerical modelling results corroborated the fact that the occurrence of landslides was the combination of natural  
352 and anthropic factors, with the decisive influence of the latter, thus is, due to the presence of several cuts along the slope



353 combined with load of constructions and leakage. Clearly, human interventions on natural slopes play a fundamental role in  
354 triggering landslides in heavily populated steep slopes surrounding urban areas.

355 Considering that the pattern of land use and construction used in the simulations is representative of most of the  
356 neighborhood of Brazilian urban areas, the methodology used in this paper ~~need~~ to be repeated and verified in other areas in  
357 order to establish more accurate critical threshold that trigger landslides. Moreover, since the prone to landslide areas of  
358 Campos do Jordão Municipality are not the most populated of Brazil compared, for instance, to the outskirts of several  
359 metropolitan areas, it becomes crucial to verify whether a mosaic of site-specific rainfall thresholds is needed in heavily  
360 occupied areas, rather a single regional threshold, as suggested by Segoni et al. (2014). In this context, this study  
361 demonstrated the using the factor of slope safety is viable for determine more accurate rainfall threshold that trigger  
362 landslides, with direct impacts on the credibility of early warning systems, which relies in minimizing false alarms or  
363 premature/late warnings.

364 Although the results of this study have uncertainties mainly associated with the geotechnical parameters used in the  
365 flow analysis and slope stability, it is the first comprehensive analysis of the factors responsible for triggering landslide in  
366 Brazil that integrates field evidence, anthropic effects, geotechnical data and numerical simulation. Future studies should  
367 combine modelling tools with probabilistic analysis to consider a wider range of geological-geotechnical and anthropic  
368 parameters in the simulations to be able to reproduce more general conditions that occur in the whole municipality.

369 Finally, considering that this work have demonstrated that the anthropic factors are the main instability factors in  
370 urban slopes, it is essential that urban managers and planners promote public policies and enforce laws that restrict the  
371 occupation of landslide susceptible areas. Detailed surveys to identify prone to landslide areas are essential, since many  
372 urban areas of Brazil lack zoning of hazardous areas, which is essential to implement regulations. Besides this, educational  
373 campaigns regarding the adoption of better construction practices and reducing piping leakage will be helpful in already  
374 consolidated occupied areas.

375  
376  
377  
378  
379  
380  
381  
382  
383



384 **References**

- 385 [ABNT - Brazilian Association of Technical Standards: Determination of the specific mass, NBR-6508. Rio de Janeiro, 8p,](#)  
386 [1984a.](#)
- 387 [ABNT - Brazilian Association of Technical Standards: Loads for the buildings structures calculation, NBR 6120. Rio de](#)  
388 [Janeiro, 5p, 1980.](#)
- 389 [ABNT - Brazilian Association of Technical Standards: Rocks and soils – terminology, NBR-6502. Rio de Janeiro, 1995.](#)
- 390 [ABNT - Brazilian Association of Technical Standards: Slopes stability, NBR-11682. Rio de Janeiro, 39p, 1991.](#)
- 391 [ABNT - Brazilian Association of Technical Standards: Soil – determination of the liquid limit, NBR 6459. Rio de Janeiro,](#)  
392 [6p, 1984c.](#)
- 393 [ABNT - Brazilian Association of Technical Standards: Soil – determination of the plastic limit, NBR 7180. Rio de Janeiro,](#)  
394 [3p, 1984d.](#)
- 395 [ABNT - Brazilian Association of Technical Standards: Soil – grain size analysis test, NBR-7181. Rio de Janeiro, 13p,](#)  
396 [1984b.](#)
- 397 [Acharya, K. P., Bhandary, N. P., Dahal, R. K., Yatabe, R.: Seepage and slope stability modelling of rainfall-induced slope](#)  
398 [failures in topographic hollows, Geomatics, Natural Hazards and Risk, 7\(2\), 721-746, 2016.](#)
- 399 [Ahrendt, A. and Zuquette, L. V.: Triggering factors of landslides in Campos do Jordão City, Brazil, Bulletin of Engineering](#)  
400 [Geology and the Environment, 62, 231-244, 2003.](#)
- 401 [Ahrendt, A.: Gravitational mass movements - proposal of a forecast system: application at the urban area of Campos do](#)  
402 [Jordão City-SP, Brazil. \(In Portuguese\), Doctoral thesis, School of Engineering of São Carlos, São Paulo University,](#)  
403 [Brazil, 390 pp., 2005.](#)
- 404 [Anderson, M. G. and Lloyd, D. M.: Using a combined slope hydrology-stability model to develop cut slope design charts.](#)  
405 [Proc. Inst. Civ. Eng., 2,705-718, 1991.](#)
- 406 [Andrade, E.: Risk mapping associated to landslides, flood, erosion and undercutting of riverbank in municipality of Campos](#)  
407 [do Jordão, São Paulo State, Brazil \(in Portuguese\), IG-CEDEC Technical Report number 01/2013, 4, 2014.](#)
- 408 [Baum, R. L., Savage, W. Z., and Godt, J. W.: TRIGRS – a FORTRAN program for transient rainfall infiltration and grid-](#)  
409 [based regional slope stability analysis, US Geological Survey Open File Report 2002-424, 38 pp, 2002.](#)
- 410 [Beven, K. J. and Kirkby, M. J.: A physically based variable contributing area model of basin hydrology, Hydrological](#)  
411 [Sciences Bulletin, 24\(1\), 43-69, 1979.](#)
- 412 [Burton, A. and Bathurst, J.: Physically based modelling of shallow landslide sediment yield at a catchment scale,](#)  
413 [Environmental Geology, 35, 89–99, 1998.](#)
- 414 [Campbell Scientific: EnviroSCAN™ soil water content profile probes, Instruction Manual, 48p, “available at:](#)  
415 <https://s.campbellsci.com/documents/us/manuals/envirosmart.pdf>, 2016.”



- 416 CEDEC – Civil Defense Coordination of the São Paulo State: databases of the summer operation emergency calls from 2000  
417 through 2013 (in Portuguese), São Paulo, 2013.
- 418 Cho, S. E.: Infiltration analysis to evaluate the surficial stability of two-layered slopes considering rainfall characteristics,  
419 *Engineering Geology*, 105, 32-43, 2009.
- 420 Coelho Netto, A. L., Avelar, A. S., Vianna, L. G. G., Araújo, I. S., Ferreira, D. L. C., Lima, P. H. M., Silva, A. P. A., and  
421 Silva, R. P.: The extreme landslide disaster in Brazil, *Landslide Science and Practice*, 6, 377-384, 2013.
- 422 Costa Filho, L. M. and Campos, T. M. P.: Anisotropy of a gneissic residual soil, in: *Proceedings of the 9th Pan-American*  
423 *Conference on Soil Mechanics and Foundations Engineering*, Vina Del Mar, Chile, 51-61, 1991.
- 424 Crosta, G.: Regionalization of rainfall thresholds: an aid to landslide hazard evaluation, *Environ Geol.*, 35, 131-145, 1998.
- 425 D’Orsi, R., D’Ávila, C., Ortigão, J. A. R., Dias, A., Moraes, L., and Santos, M. D.: Rio-Watch: The Rio de Janeiro Landslide  
426 Watch System, in: *Proceedings of the 2<sup>nd</sup> Pan-American Symposium on Landslides*, Rio de Janeiro, Brazil, 21-30, 1997.
- 427 Dietrich, W. E., Asua, R. R., Orr, J. C. B., and Trso, M.: A validation study of the shallow slope stability model,  
428 SHALSTAB, in the forest lands of Northern California. *Stillwater Ecosystem, Watershed and Riverine Sciences*,  
429 Berkeley, 59 pp, 1998.
- 430 Frattini, P.; Crosta, G., and Sosio, R.: Approaches for defining thresholds and return periods for rainfall-triggered shallow  
431 landslides, *Hydrol Process.*, 23, 1444-1460, 2009.
- 432 Gasmo, J. M.; Rahardjo, H., and Leong, E. C.: Infiltration effects on stability of a residual soil slope, *Computers and*  
433 *Geotechnics*, 26, 145-65, 2000.
- 434 Geo-Slope: Seepage modeling with SEEP/W: an engineering methodology, User manual, Geo-Slope International, 199p,  
435 2012b.
- 436 Geo-Slope: Stability modeling with SLOPE/W: an engineering methodology, User manual, Geo-Slope International, 238p,  
437 2012a.
- 438 GeoStudio: GeoStudio Tutorials includes student edition lessons. Calgary, Alberta, Canadian: Geo-Slope International Ltd.,  
439 2012.
- 440 Guzzetti, F.; Peruccacci, S.; Rossi, M., and Stark, C.P.: Rainfall thresholds for the initiation of landslides in central and  
441 southern Europe, *Meteorology and Atmospheric Physics*, 98, 239-267, 2007.
- 442 Huat, B .B. K., Ali, F. H., and Rajoo, R. S. K.: Stability analysis and stability chart for unsaturated residual soil slope,  
443 *American Journal of Environmental Sciences*, 2 (4), 154-160, 2006.
- 444 IBGE – Brazilian Institute of Geography and Statistics, social and economic data of the Brazilian citizens (in Portuguese),  
445 “available at: <http://cidades.ibge.gov.br/painel>, 2016.”
- 446 Iverson, R. M.: Landslide triggering by rain infiltration, *Water Resour. Res.*, 36, 1897-1910, 2000.
- 447 Kim, J., Jeong, S., Park, S., and Sharma, J.: Influence of rainfall-induced wetting on the stability of slopes in weathered soils,  
448 *Engineering Geology* .75, 251-262, 2004.



- 449 [Lagomarsino, D., Segoni, S., Fanti, R., and Catani, F.: Updating and tuning a regional-scale landslide early warning system,](#)  
450 [Landslides, 10, 91–97, 2013. DOI: 10.1007/s10346-012-0376-y](#)
- 451 [Londe, L. R., Coutinho, M. P., Di Gregório, L. T., Santos, L. B. L., and Soriano, E.: Water related disasters in Brazil:](#)  
452 [perspectives and recommendations \(in Portuguese\), Ambiente and Sociedade, 17\(4\), 133-152, 2014.](#)
- 453 [Ng, C.W.W. and Shi, Q.: Influence of rainfall intensity and duration on slope stability in unsaturated soils, Quarterly Journal](#)  
454 [of Engineering Geology, 31, 105-113, 1998.](#)
- 455 [Oh, W.T. and Vanapalli, S.K.: Influence of rain infiltration on the stability of compacted soil slopes, Computers and](#)  
456 [Geotechnics, 37, 649-657, 2010.](#)
- 457 [Pack, R. T., Tarboton, D. G., and Goodwin, C. N.: The SINMAP approach to terrain stability mapping, in: Proceedings of](#)  
458 [the 8th Congress of the International Association of Engineering Geology, Vancouver, Canada, 21-25, 1998.](#)
- 459 [Rahardjo, H., Ong, T. H., Rezaur, R. B., and Leong, E. C.: Factors controlling instability of homogeneous soil slopes under](#)  
460 [rainfall, J. Geotech. Geoenviron. Eng., 133 \(12\), 1532-1543, 2007.](#)
- 461 [Reis, R.M., Azevedo, R.F., Botelho, B.S., and Vilar, O.M.: Performance of a cubical triaxial apparatus for testing saturated](#)  
462 [and unsaturated soils, Geotechnical Testing Journal, 34 \(3\), 1-9, 2011.](#)
- 463 [Ridente, J. L., Ogura, A. T., Macedo, E. S., Diniz, N. C., Alberto, M. C., and Santos, H. P.: Accidents associated to mass](#)  
464 [movements that were occurred in municipality of Campos do Jordão, SP, at January 2000: technical actions after the](#)  
465 [disasters \(in Portuguese\), IPT publications number 2815, 14p, 2002.](#)
- 466 [Rigon, R., Bertoldi, G., Over, T. M.: Geotop: a distributed hydrological model with coupled water and energy budgets,](#)  
467 [Journal of Hydrometeorology, 7\(3\), 371– 388, 2006.](#)
- 468 [SABESP: Leak tests, <http://site.sabesp.com.br/site/interna/Default.aspx?secaoId=244>, Accessed 04 Abril 2016, 2016.](#)
- 469 [SABESP: Water reduction program not charged, Synthetic report, Sao Paulo: Lyonnaise des Eaux Services Associés –](#)  
470 [LYSA, 1993.](#)
- 471 [Santoro, J., Mendes, R. M., Pressinotti, M. M. N. and Manoel, G. R.: Correlation between rainfall and landslides occurred](#)  
472 [during the operation of the prevention plan of civil defense in State of São Paulo, SP \(in Portuguese\), in: Proceedings of](#)  
473 [the 7th Brazilian Symposium on Geotechnical and Geoenvironmental Cartography, Maringá, Paraná, 1-15, 2010.](#)
- 474 [Segoni, S., Rosi, A., Rossi, G., Catani, F., and Casagli, N.: Analysing the relationship between rainfalls and landslides to](#)  
475 [define a mosaic of triggering thresholds for regional-scale warning systems, Nat. Hazards Earth Syst. Sci., 14, 2637–2648,](#)  
476 [doi:10.5194/nhess-14-2637-2014, 2014.](#)
- 477 [Tatizana, C., Ogura, A. T., Cerri, L. E. S., and Rocha, M. C. M.: Numerical modeling of the analysis of correlation between](#)  
478 [rainfall and landslides applied to the slopes of the Serra do Mar in municipality of Cubatão \(in Portuguese\), in:](#)  
479 [Proceedings of the 2nd Brazilian Congress of Engineering Geology, 237-248, 1987.](#)
- 480 [Terlien, M. T.: The determination of statistical and deterministic hydrological landslide triggering thresholds, Environ Geol.,](#)  
481 [35, 124-130, 1998.](#)



- 482 [Van Asch, T. W. J., Buma, J., and Van Beek, L. P. H.: A view on some hydrological triggering systems in landslides,](#)  
483 [Geomorphology, 30, 25-32, 1999.](#)
- 484 Van Genuchten, M. T.: A closed-form equation for predicting the hydraulic conductivity of unsaturated soils, Journal of the  
485 Soil Science Society of America, 44, 892-898, 1980.
- 486  
487  
488  
489  
490  
491  
492  
493  
494  
495  
496  
497  
498  
499  
500  
501  
502  
503  
504  
505  
506  
507  
508  
509  
510  
511  
512  
513  
514  
515





516  
 517  
 518

Table 1 – Historical disasters in Campos do Jordao Municipality. Source: Ridente et al. (2002) and Andrade (2014).

| Process                  | Location                                                                                             | Year | Damages                                       | Causes                                                                                |
|--------------------------|------------------------------------------------------------------------------------------------------|------|-----------------------------------------------|---------------------------------------------------------------------------------------|
| Mudflow                  | Vila Albertina                                                                                       | 1972 | 17 fatalities<br>60 houses buried             | Saturated soil (8m thick),<br>loading and vibration due to<br>construction activities |
| Landslide                | Britador, Vila Santo Antonio<br>and Vila Paulista Popular                                            | 1991 | 149 affected<br>11 houses buried<br>4 injured | 214.5 mm of rainfall<br>in three days                                                 |
| Landslide and<br>Mudflow | Britador, Vila Albertina, Vila Santo<br>Antônio, Vila Nadir Vila Sodipe and Vila<br>Paulista Popular | 2000 | 10 fatalities<br>1840 affected                | 453.2 mm in five days                                                                 |

519  
 520  
 521  
 522

Table 2 – Results of the geotechnical survey of soils of the study areas.

| Sample  | Depth (m) | Soil layer | USCS  | Unit weight (kN/m <sup>3</sup> ) | Effective cohesion (kPa) | Effective friction angle (°)              | Hydraulic conduct. (m/day) | Gravel (%) | Sand (%) | Silt (%) | Clay (%) | w <sub>l</sub> (%) | w <sub>p</sub> (%) | IP (%) |
|---------|-----------|------------|-------|----------------------------------|--------------------------|-------------------------------------------|----------------------------|------------|----------|----------|----------|--------------------|--------------------|--------|
|         |           |            |       | Format                           |                          | Present the hydraulic conductivity in m/s |                            |            |          |          |          |                    |                    |        |
|         | 2.0       | R          | SC    | 18.3                             | 37                       | 56                                        | 0.384                      | 10         | 53       | 25       | 12       | 27                 | 18                 | 9      |
| SD-01   | 4.6       | S          | SC    | 19.1                             | 18                       | 37                                        | 0.817                      | 0          | 53       | 35       | 12       | 35                 | 22                 | 13     |
|         | 6.6       | S          | SC    | 17.9                             | 2                        | 49                                        | 0.685                      | 0          | 59       | 27       | 14       | 29                 | 20                 | 9      |
| SD-02   | 2.6       | S          | SC    | 21.4                             | 19                       | 34                                        | 0.102                      | 5          | 50       | 21       | 24       | 28                 | 17                 | 11     |
|         | 4.6       | S          | SM    | 17.5                             | 14                       | 42                                        | 0.325                      | 0          | 73       | 14       | 13       | 33                 | 20                 | 13     |
| SD-03   | 1.6       | S          | SM-SC | 18.1                             | 22                       | 43                                        | 0.454                      | 1          | 59       | 29       | 11       | 22                 | 15                 | 7      |
|         | 2.6       | S          | SM-SC | 16.8                             | 2                        | 52                                        |                            | 5          | 55       | 30       | 10       | 23                 | 17                 | 6      |
| SD-05   | 12.8      | S          | SC    | 17.5                             | 48                       | 54                                        | 0.053                      | 0          | 55       | 33       | 12       | 32                 | 21                 | 11     |
| SD-06   | 7.6       | S          | SM    | 17.8                             | 42                       | 28                                        | 0.024                      | 1          | 72       | 15       | 12       | -                  | -                  | -      |
| Block-1 | 2.0       | S          | SM    | 16.0                             | 2                        | 53                                        | 0.267                      | 0          | 72       | 21       | 7        | -                  | -                  | -      |
| Block-2 | 2.0       | S          | SM    | 16.0                             | 49                       | 37                                        | 0.081                      | 0          | 55       | 42       | 3        | -                  | -                  | -      |
| Block-3 | 3.0       | S          | SM    | 16.0                             | 13                       | 46                                        | 0.258                      | 0          | 58       | 28       | 14       | -                  | -                  | -      |

523 # Residual soil (R); Saprolith (S).

524  
 525



526  
 527  
 528  
 529  
 530  
 531  
 532  
 533  
 534  
 535  
 536  
 537  
 538  
 539  
 540  
 541  
 542  
 543  
 544  
 545  
 546  
 547  
 548

Table 3 – Geotechnical and anthropic parameters used on unsaturated seepage and stability analysis

| Profile | Geotechnical        |                  |              |                                      |                                    |                                  |                             | Anthropic            |                          |                                        |                             |                                                          |
|---------|---------------------|------------------|--------------|--------------------------------------|------------------------------------|----------------------------------|-----------------------------|----------------------|--------------------------|----------------------------------------|-----------------------------|----------------------------------------------------------|
|         | Slope declivity (°) | Slope height (m) | Soil layers  | Shear strength effective parameters# | Unit weight (kN m <sup>-3</sup> )# | Rainfall (m day <sup>-1</sup> )  | Ksat (m day <sup>-1</sup> ) | Matric suction (kPa) | Level of the water table | Load in the slope (kNm <sup>-2</sup> ) | Height of the cut slope (m) | Leaking in the slope (m <sup>3</sup> day <sup>-1</sup> ) |
| A - A'  | 11 - 40             | 130              |              |                                      |                                    |                                  |                             |                      |                          |                                        |                             |                                                          |
|         |                     |                  | Fill Deposit | c' = 2 kPa<br>φ' = 31°               | 14,9                               | Rainfall events of the 2000 year | 0,8208                      | -7                   |                          |                                        |                             |                                                          |
| B - B'  | 16 - 33             | 95               | Residual     | c' = 15 kPa<br>φ' = 36°              | 18,3                               |                                  | 0,3840                      | -40                  | Data of SPT              | 2.0                                    | 6.0                         | 1.0                                                      |
|         |                     |                  | Saprolith    | c' = 21 kPa<br>φ' = 43°              | 19,1                               |                                  | 0,4694                      | -40                  |                          |                                        |                             |                                                          |
| C - C'  | 15 - 35             | 87               |              |                                      |                                    |                                  |                             |                      |                          |                                        |                             |                                                          |

# Fill Deposit (geotechnical parameters from Ahrendt, 2005)



549

550

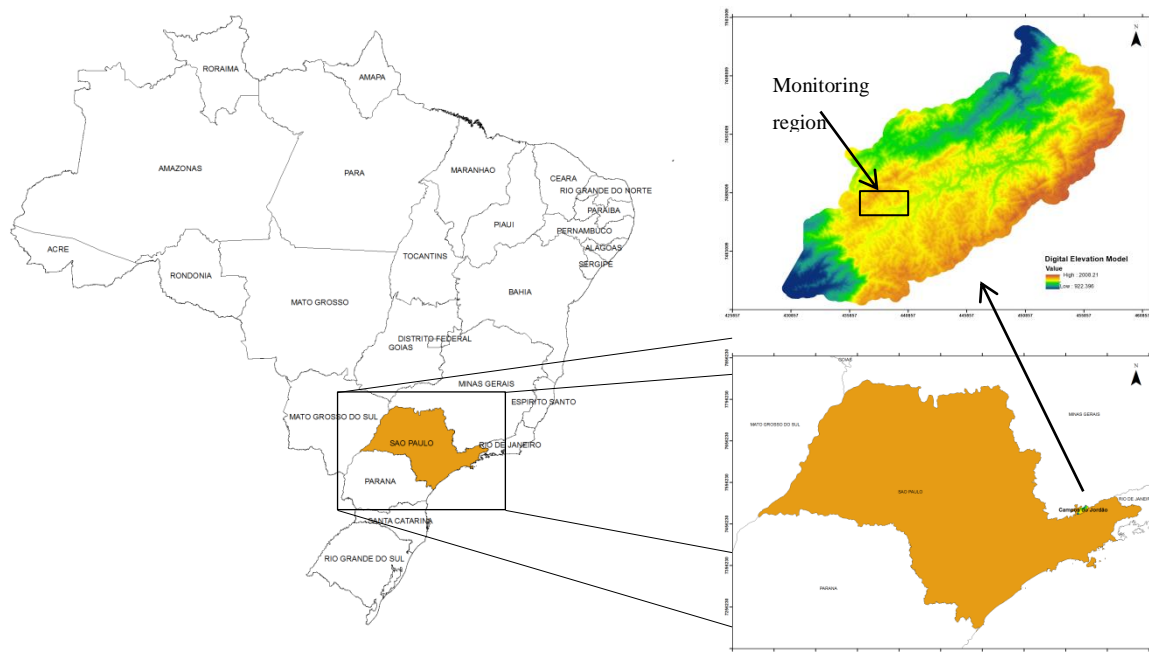

551

552

553

554

555

556

557

558

559

560

561

562

563

564

565

566

567

**Figure 1.** Geographical location of Campos do Jordao municipality and an inset of the study site.



568  
569  
570  
571

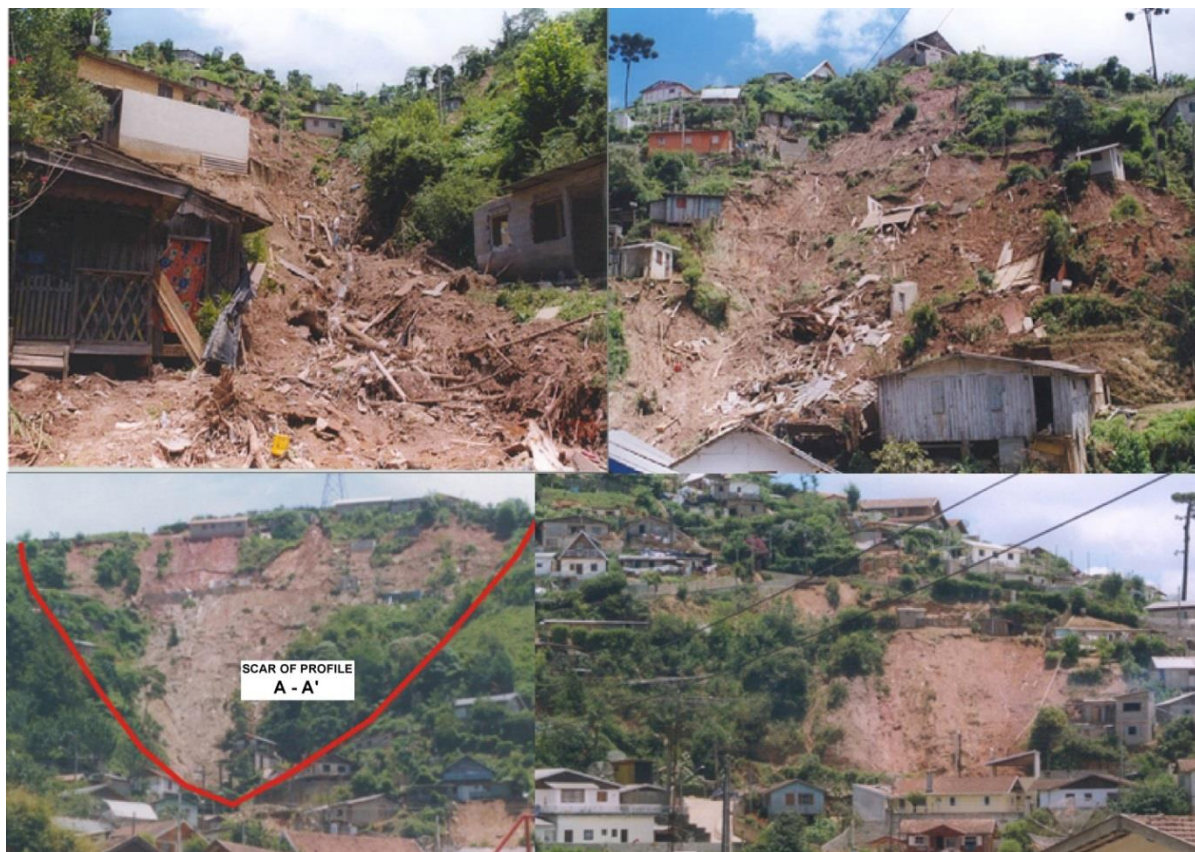

572  
573  
574  
575  
576  
577  
578  
579  
580  
581  
582  
583

**Figure 2.** Landslides typology that happened in 2000 on the study site (Source: Ridente et al., 2002).



584  
585  
586

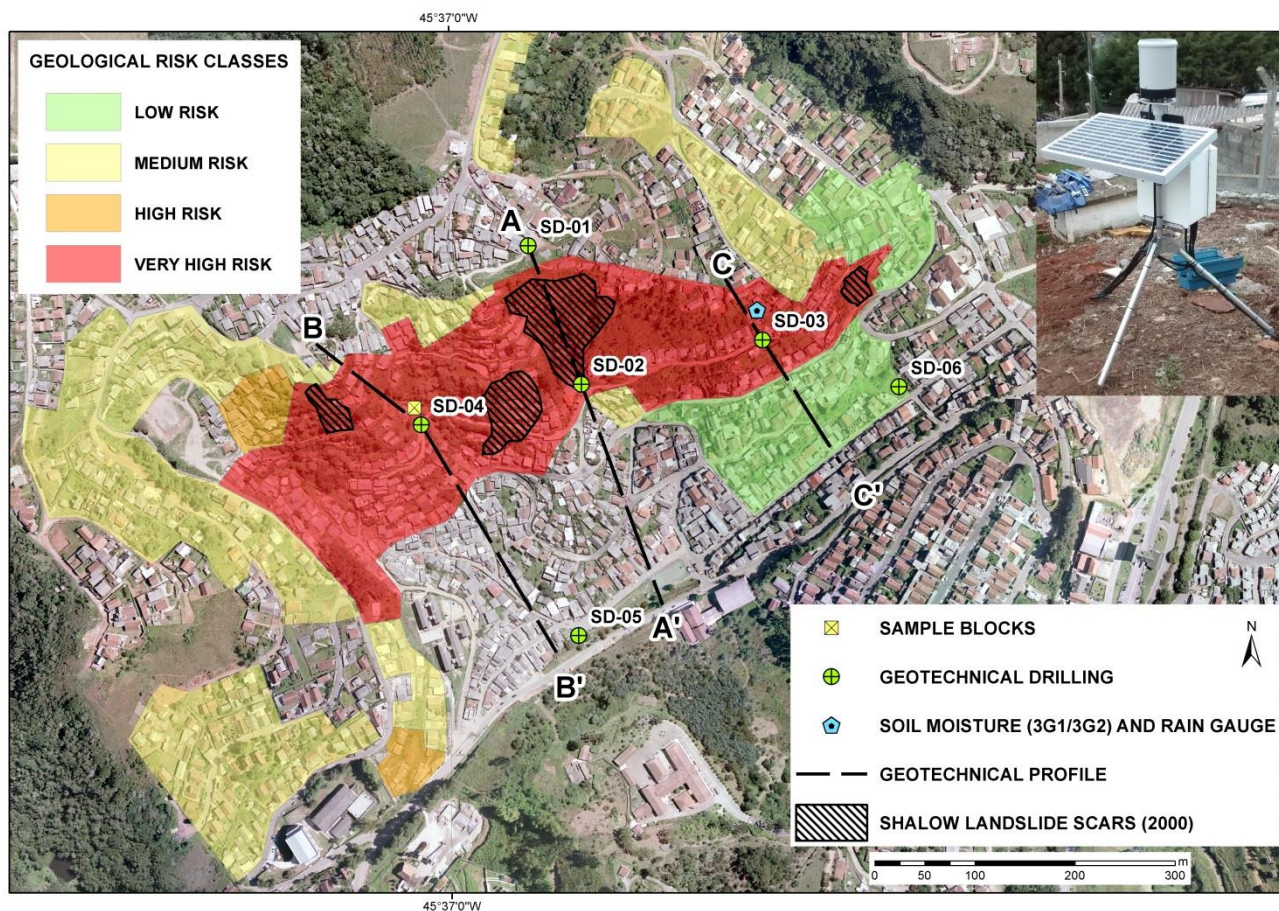

587  
588  
589  
590  
591  
592  
593  
594  
595  
596  
597  
598

**Figure 3.** Satellite image of the study site showing the location of monitoring instruments (symbols), geotechnical transects (dotted lines along the slopes); landslide susceptibility areas indicating the level of risk (areas shaded in yellow, orange and red); scars of previous shallow landslides (black cross-hatched area) and deposits of landslides events (blue cross-hatched areas).



599  
600  
601

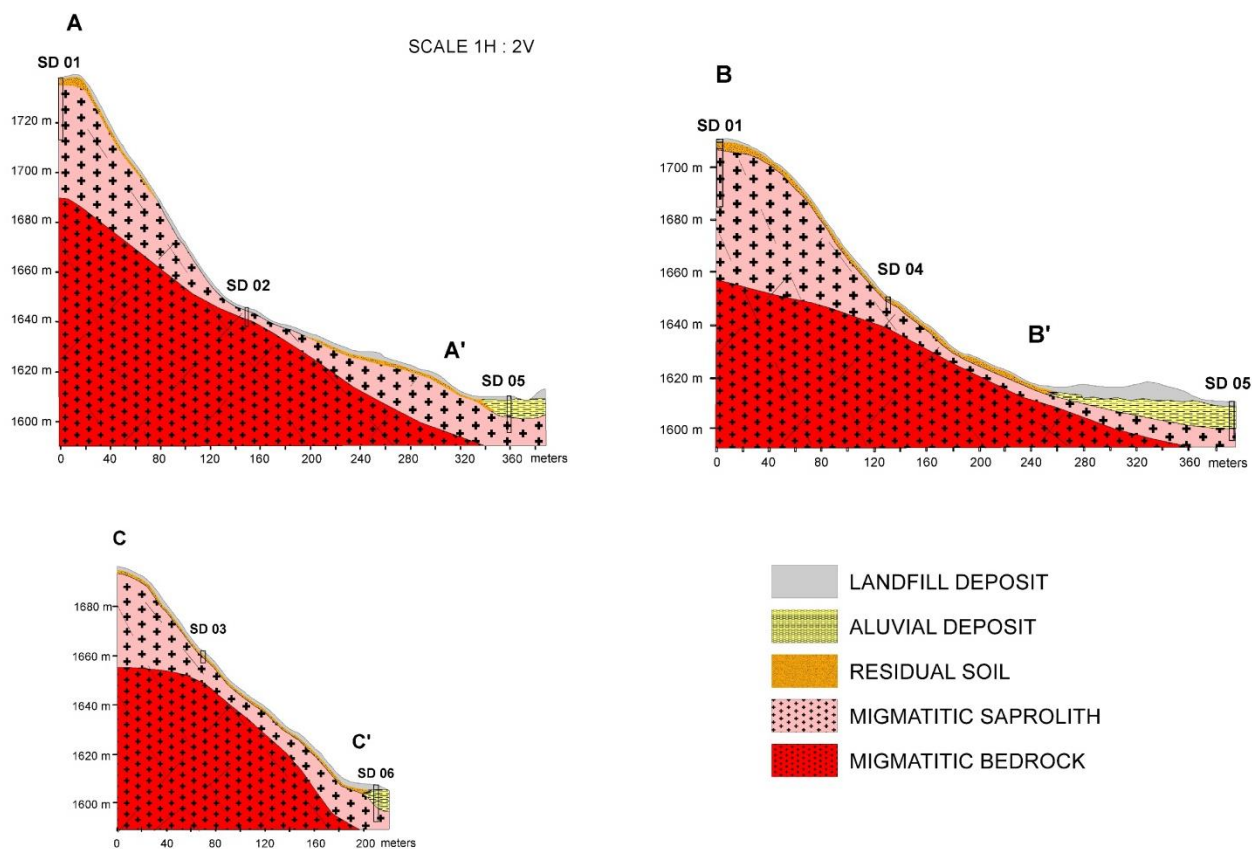

**Figure 4.** Geological-geotechnical profiles of the study area derived from the geotechnical survey.

602  
603  
604  
605  
606  
607  
608  
609  
610  
611  
612  
613  
614

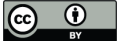

615

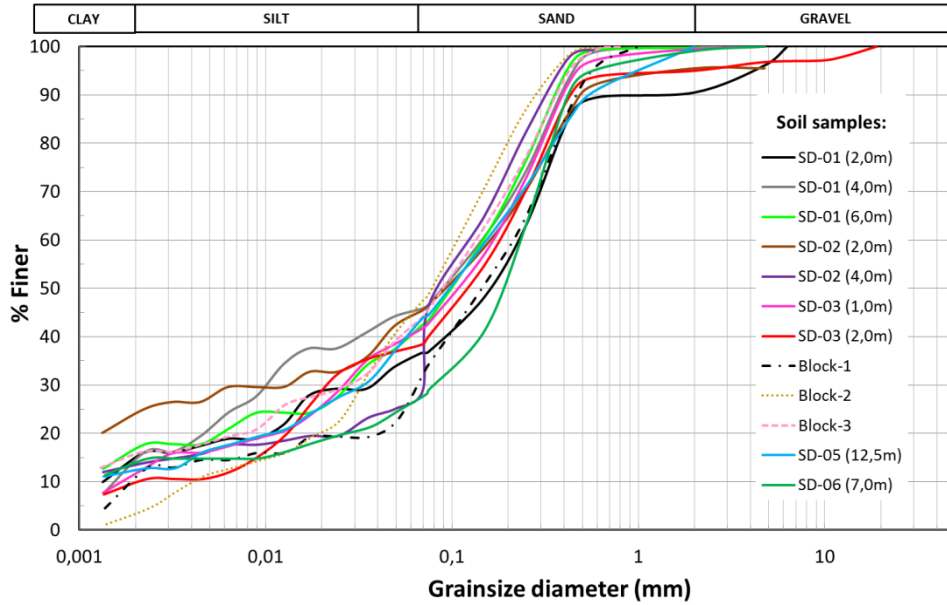

616

617

618

619

620

621

**Figure 5.** Granulometric distribution for the residual soil and the saprolith of the six boreholes analysed (SD-01 to SD-06) and for the undisturbed soil cores (Block-1 to Block-3).

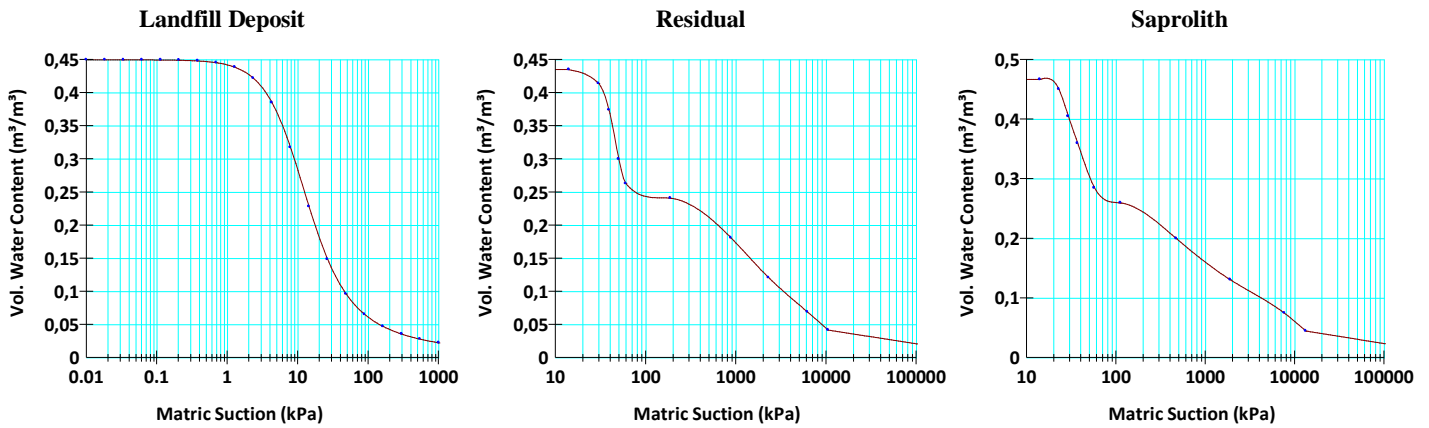

622

623

624

625

626

**Figure 6.** Water retention curves of the three soil types used in transient seepage analysis.



627  
628  
629

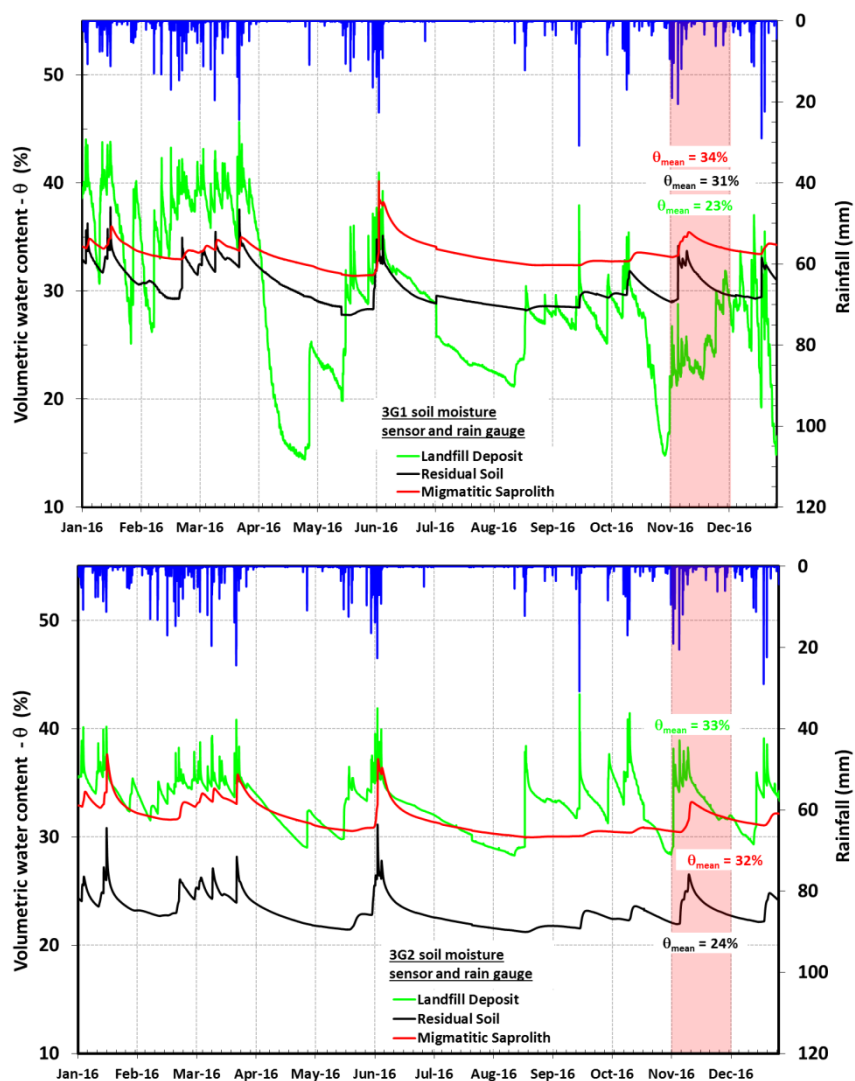

630  
631  
632  
633  
634  
635  
636

**Figure 7.** Time variation of soil moisture at different depths during 2016 in the study area in the sensor 3G1 (upper graph) and 3G2 (bottom graph).



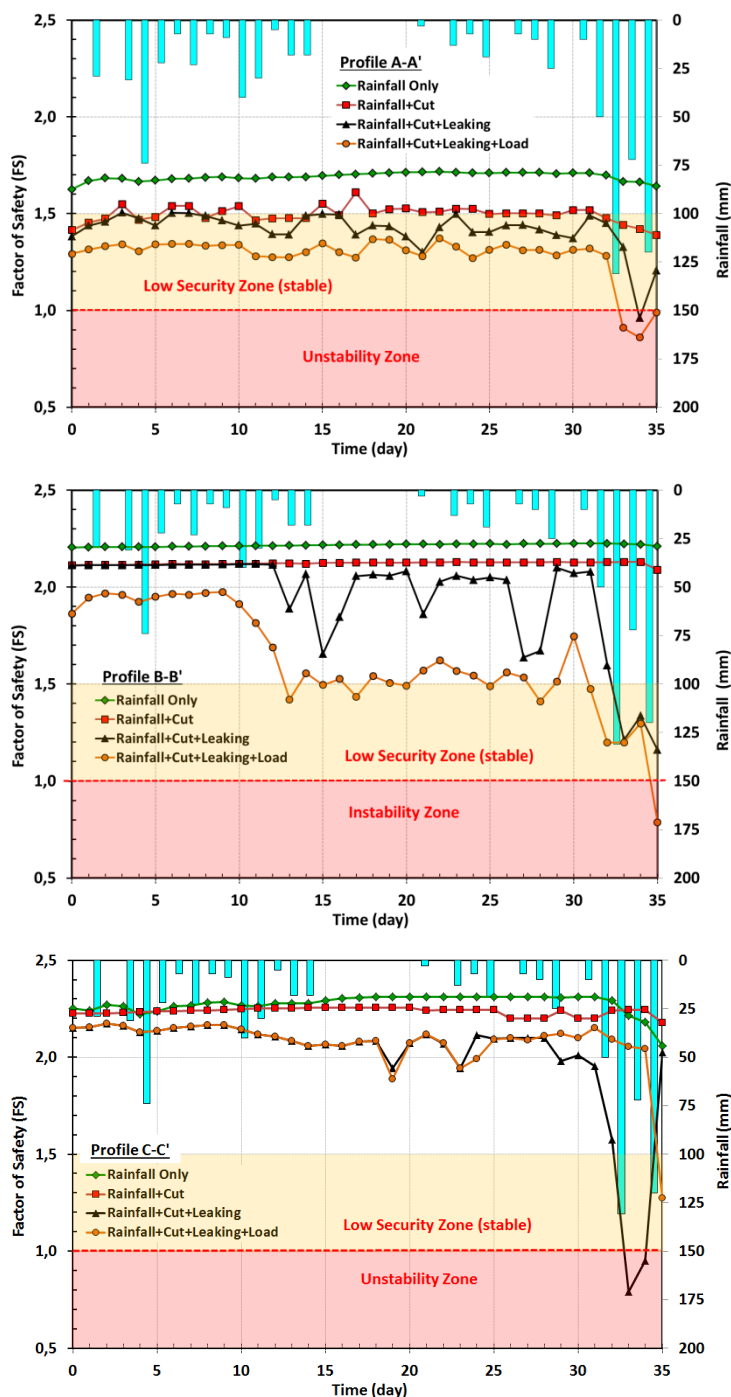

637 **Figure 8.** Time variation of the factor of safety for natural conditions and taken into account the additional effects introduced by anthropic  
 638 disturbances on profiles A-A', B-B' and C-C'.  
 639
